# Supplementary material
Source: PubMed Central journal article supplement (PMC7611428)
Supplement: EMS130992-supplement-Supplementary_material.pdf [file EMS130992-supplement-Supplementary_material.pdf]

Supplementary Table 1 MRI acquisition protocol

|                               | Orientation | Voxel size mm | TR, ms | TE, ms | TI, ms | Matrix  |
|-------------------------------|-------------|---------------|--------|--------|--------|---------|
| <i><sup>1</sup>H MRI</i>      |             |               |        |        |        |         |
| T2/PD                         | Axial       | 1x1x3         | 3500   | 19/85  |        | 240x180 |
| 2D T1-weighted spin echo      | Axial       | 1x1x3         | 625    | 10     |        | 240x180 |
| 3D T1-weighted TFE            | Sagittal    | 1x1x1         | 6.9    | 3.1    | 824    | 256x256 |
| <i><sup>23</sup>Na MRI</i>    |             |               |        |        |        |         |
| Sodium scan                   | Axial       | 3x3x3         | 120    | 0.22   |        | 80x80   |
| <sup>1</sup> H PD/T2-weighted | Axial       | 1x1x3         | 3875   | 19/85  |        | 200x200 |

Abbreviations: TE = echo time; TFE = turbo field echo; TI = inversion time; TR = repetition time
